# Supplementary material for: A Streptomyces sp. NEAU-HV9: Isolation, Identification, and Potential as a Biocontrol Agent against Ralstonia solanacearum of Tomato Plants
Source: MDPI journal article supplement (doi:10.3390/microorganisms8030351), 2020-03-01
Supplement: s1 [file s1]

# A *Streptomyces* sp. NEAU-HV9: Isolation, identification, and potential as a biocontrol agent against *Ralstonia Solanacearum* of tomato plants

Ling Ling<sup>1</sup>, Xiaoyang Han<sup>1</sup>, Xiao Li<sup>1</sup>, Xue Zhang<sup>1</sup>, Han Wang<sup>1</sup>, Lida Zhang<sup>1</sup>, Peng Cao<sup>1</sup>, Yutong Wu<sup>1</sup>, Xiangjing Wang<sup>1</sup>, Junwei Zhao<sup>1,\*</sup> and Wensheng Xiang<sup>1,2,\*</sup>

<sup>1</sup> Key Laboratory of Agricultural Microbiology of Heilongjiang Province, Northeast Agricultural University, No. 59 Mucai Street, Xiangfang District, Harbin 150030, China; LLYNL2621161093@163.com (L.L.); hanxy139251@163.com (X.H.); Lx1244070003@126.com (X.L.); zhangxue\_968425@163.com (X.Z.); wanghan507555536@gmail.com (H.W.); yone910310@163.com (L.Z.); cp511@126.com (P.C.); 18103699151@163.com (Y.W.); wangneau2013@163.com (X.W.)

<sup>2</sup> State Key Laboratory for Biology of Plant Diseases and Insect Pests, Institute of Plant Protection, Chinese Academy of Agricultural Sciences, Beijing 100193, China

\* Correspondence: guyan2080@126.com (J.Z.), xiangwensheng@neau.edu.cn (W.X.)

**Table S1.** Growth and cultural characteristics of strain NEAU-HV9 after 2 weeks at 28 °C

| Medium | Growth | Aerial mycelium      | Substrate mycelium      | Diffusible pigment       |
|--------|--------|----------------------|-------------------------|--------------------------|
| ISP 1  | Good   | White                | Moderate Yellow         | Vivid Yellow             |
| ISP 2  | Good   | White                | Brilliant Orange Yellow | Light Orange Yellow      |
| ISP 3  | Good   | White                | Brilliant Orange Yellow | Light Yellow             |
| ISP 4  | Good   | White                | Brilliant Yellow        | Dark Greenish Yellow     |
| ISP 5  | Good   | Moderate Yellow      | Grayish Yellow          | Moderate Yellow          |
| ISP 6  | Good   | None                 | Moderate Yellow         | Moderate Yellow          |
| ISP 7  | Good   | Pale Greenish Yellow | Dark Olive              | Moderate Olive           |
| NA     | Good   | None                 | Moderate Yellow         | Moderate Greenish Yellow |
| BA     | Good   | None                 | Brilliant Orange Yellow | Light Orange Yellow      |
| CA     | Poor   | White                | Pinkish White           | None                     |

**Table S2.** Physiological and biochemical characteristics of strain NEAU-HV9, Abbreviation: +, positive; –, negative.

| Characteristic                        | Result | Characteristic              | Result |
|---------------------------------------|--------|-----------------------------|--------|
| Growth at/with:                       |        | Decomposition of            |        |
| Temperature range (°C)                | 15-37  | Adenine                     | +      |
| Growth pH range                       | 5-9    | Casein                      | –      |
| Maximum NaCl                          | 7      | Hypoxanthine                | +      |
| Production of H <sub>2</sub> S        | +      | Tyrosine                    | +      |
| Reduction of nitrate                  | –      | Xanthine                    | +      |
| Coagulation and peptonization of milk | –      | Hydrolysis of               |        |
| Liquefaction of gelatin               | –      | Aesculin                    | +      |
| Carbon source utilization             |        | Starch                      | +      |
| L-Arabinose                           | –      | Nitrogen source utilization |        |
| Dulcitol                              | –      | L-Alanine                   | +      |
| D-Fructose                            | –      | D-Arginine                  | +      |
| D-Galactose                           | +      | L-Asparagine                | +      |
| D-Glucose                             | +      | L-Aspartic acid             | +      |
| Inositol                              | +      | Creatine                    | –      |
| Lactose                               | –      | L-Glutamic acid             | +      |
| D-Maltose                             | +      | L-Glutamine                 | +      |
| D-Mannose                             | +      | Glycine                     | +      |
| L-Raffinose                           | +      | L-Proline                   | +      |
| D-Ribose                              | –      | L-Serine                    | +      |
| D-Sorbitol                            | –      | L-Threonine                 | +      |
| D-Sucrose                             | +      | L-Tyrosine                  | +      |
| D-Xylose                              | –      |                             |        |

All data was obtained from this study.

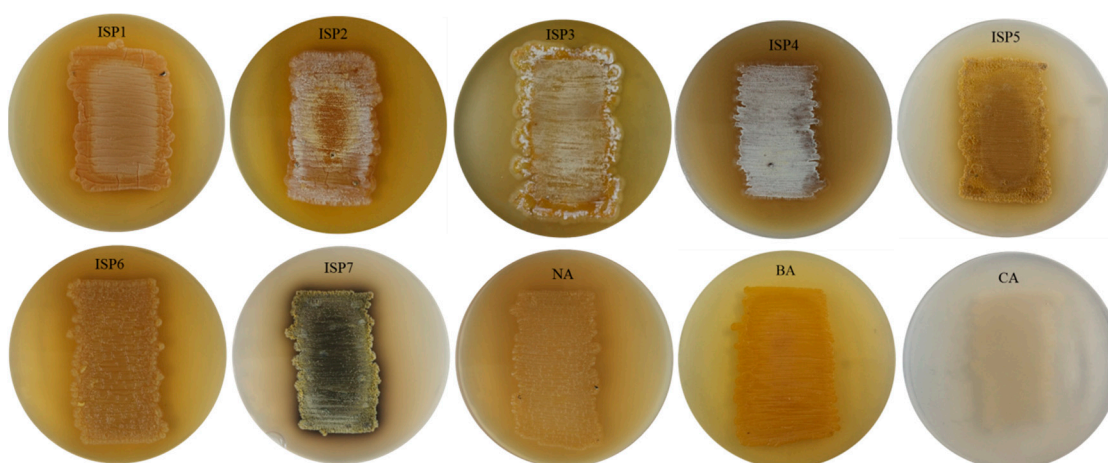

**Figure S1.** Cultural characteristics of strain NEAU-HV9 observed on ISP 1, ISP 2, ISP 3, ISP 4, ISP 5, ISP6, ISP7, Nutrient agar, Bennett's agar and Czapek's agar after being incubated at 28 °C for 2 weeks.

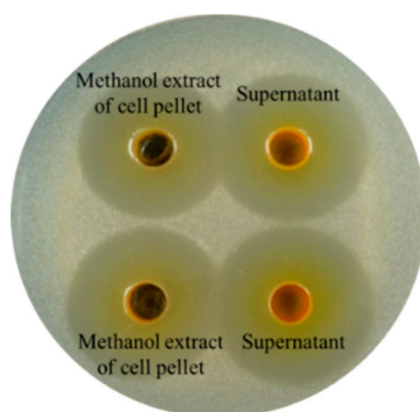

**Figure S2.** Bioactivities of the supernatant and cell pellet of NEAU-HV9 against *R. solanacearum*.

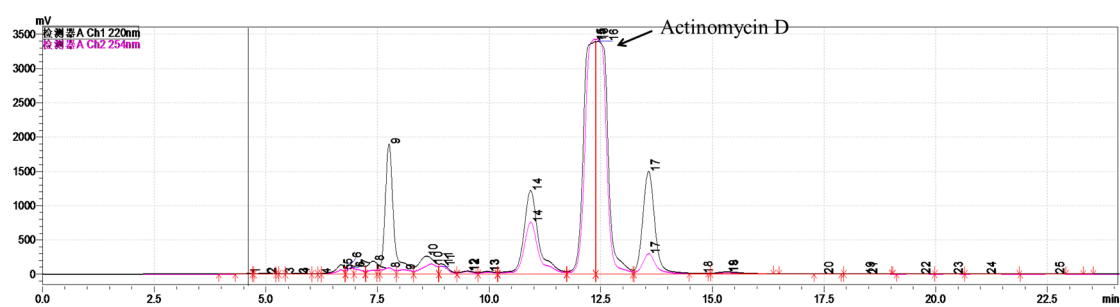

**Figure S3.** The HPLC profiles of crude extract produced by *Streptomyces* NEAU-HV9.

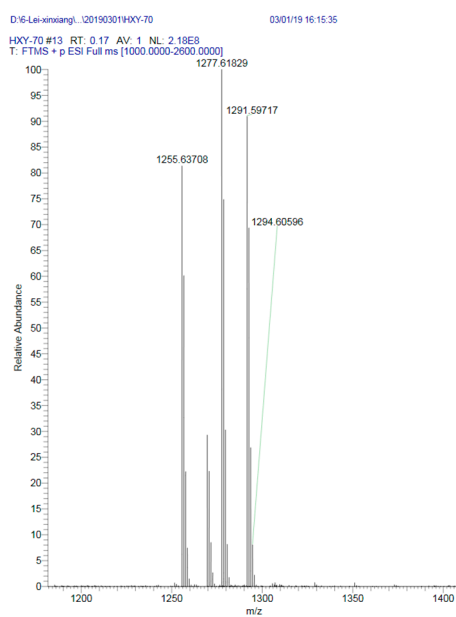

**Figure S4.** Mass Spectrometry of actinomycin D ( $C_{62}H_{86}N_{12}O_{16}Na$  : 1277.6).

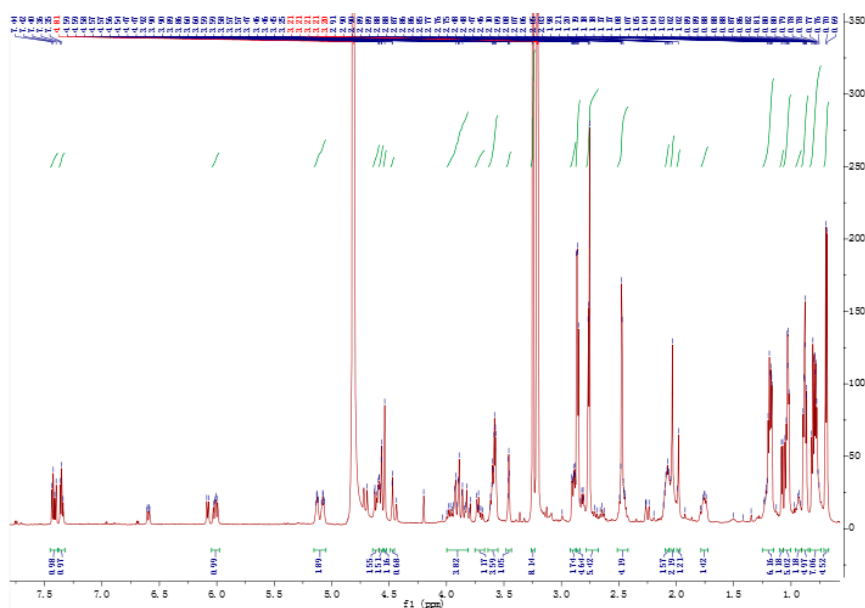

Figure S5.  $^1\text{H}$  NMR of actinomycin D.

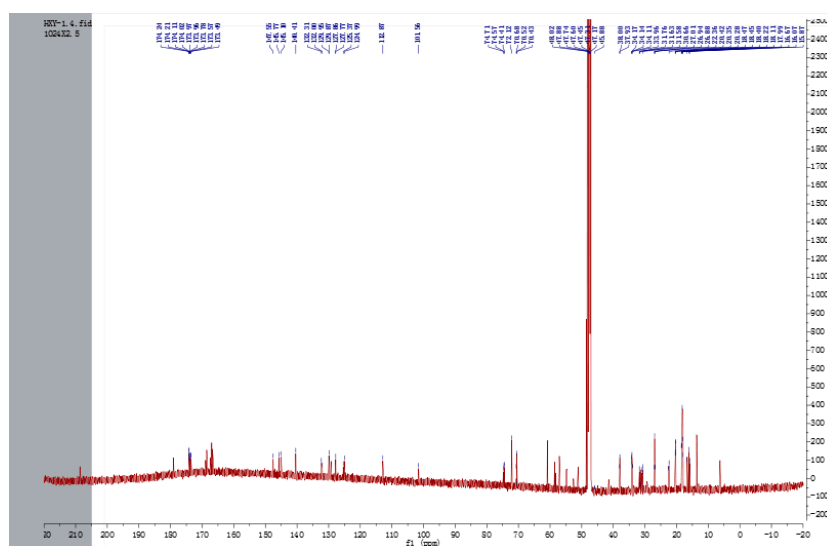

Figure S6.  $^{13}\text{C}$  NMR of actinomycin D.

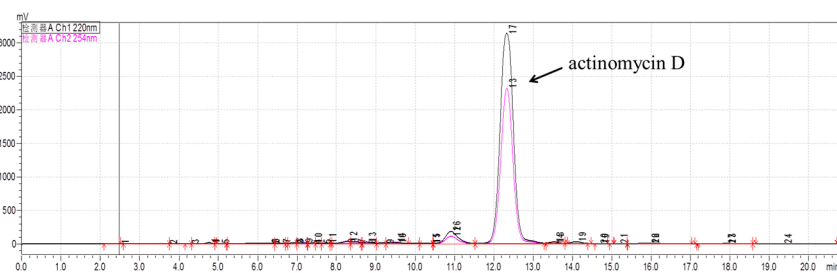

Figure S7. The HPLC profiles of commercial actinomycin D.

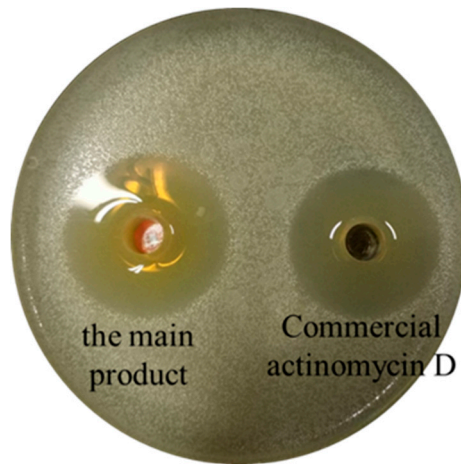

**Figure S8.** Bioactivities of commercial actinomycin D and the main product of NEAU-HV9 against *R. solanacearum*.

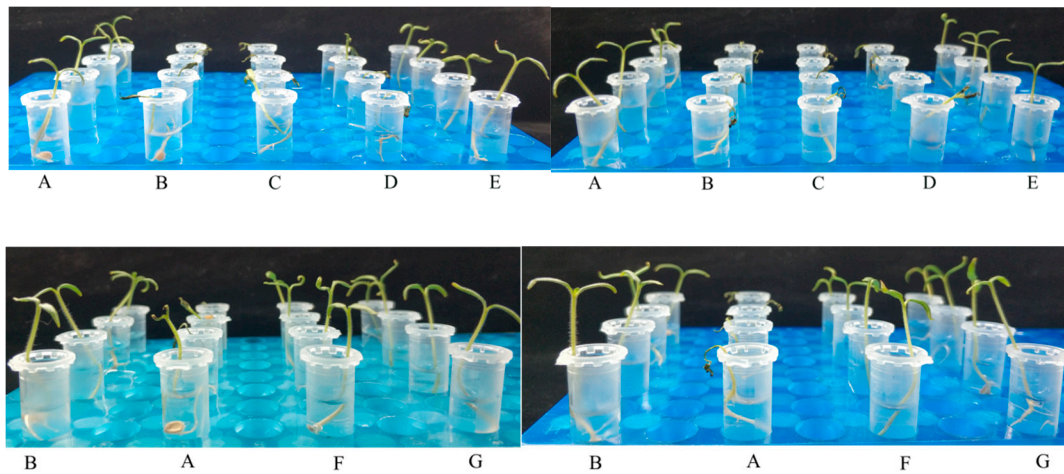

**Figure S9.** Control efficiency of strain NEAU-HV9 against *R. solanacearum*. A, tomato seedlings were inoculated with sterile water (CK 1); B, tomato seedlings only were inoculated with *R. solanacearum* (CK 2); C, tomato seedlings were preinoculated with suspension ( $10^7$  cfu mL<sup>-1</sup>) of NEAU-HV9 and then inoculated with *R. solanacearum* (TR 1); D, tomato seedlings were preinoculated with suspension ( $10^8$  cfu mL<sup>-1</sup>) of NEAU-HV9 and then inoculated with *R. solanacearum* (TR 1); E, tomato seedlings were preinoculated with suspension ( $10^9$  cfu mL<sup>-1</sup>) of NEAU-HV9 and then inoculated with *R. solanacearum* (TR 1); F, actinomycin D at the concentration  $1 \times \text{MIC}$  (TR 2); G, actinomycin D at the concentration  $2 \times \text{MIC}$  (TR 2).

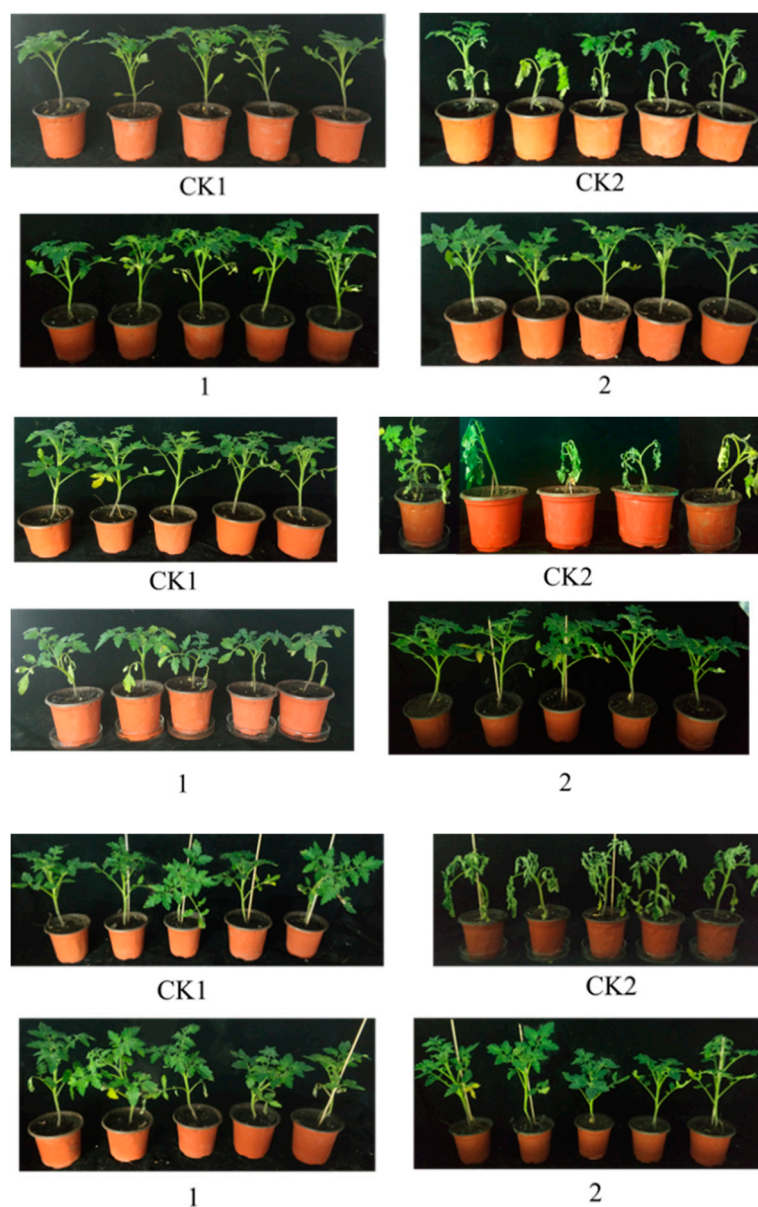

**Figure S10.** Control efficiency of the actinomycin D and strain NEAU-HV9 against *R. solanacearum*. CK 1, positive control; CK 2, negative control; 1, tomato seedlings were preinoculated with suspension ( $10^9$  cfu g<sup>-1</sup>) of NEAU-HV9; 2, actinomycin D at the concentration  $1 \times \text{MIC}$ .
